# Supplementary material
Source: PubMed Central journal article supplement (PMC4740290)
Supplement: NIHMS703630-supplement-Supplement_Materials.pdf [file NIHMS703630-supplement-Supplement_Materials.pdf]

**Web-based Supplementary Materials for “Quantile Regression Analysis of Censored Longitudinal Data with Irregular Outcome-Dependent Follow-Up”**

**Xiaoyan Sun<sup>1</sup>, Limin Peng<sup>1,\*</sup>, Amita Manatunga<sup>1</sup>, and Michele Marcus<sup>2</sup>**

<sup>1</sup>Department of Biostatistics and Bioinformatics

Rollins School of Public Health, Emory University

Atlanta, GA 30322, U.S.A.

<sup>2</sup>Departments of Epidemiology and Environmental Health

Rollins School of Public Health, Emory University

Atlanta, GA 30322, U.S.A.

*\*email:* lpeng@sph.emory.edu

**Web Appendix A: Notation, Regularity Conditions, and Prelim**

Define  $\zeta_i^\tau(\boldsymbol{\beta}; \boldsymbol{\alpha}) = \int_0^\infty \rho_\tau [Y_i(t) - \max\{c, \mathbf{X}_i(t)^\top \boldsymbol{\beta}\}] [dN_i^L(t) + \exp\{-\mathbf{h}_i(t)^\top \boldsymbol{\alpha}\} dN_i(t)]$ , and

$$\ell_i^\tau(\boldsymbol{\beta}; \boldsymbol{\alpha}) = \int_0^\infty \mathbf{X}_i(t) I\{\mathbf{X}_i(t)^\top \boldsymbol{\beta} > c\} [I\{Y_i(t) < \mathbf{X}_i(t)^\top \boldsymbol{\beta}\} - \tau] [dN_i^L(t) + \exp\{-\mathbf{h}_i(t)^\top \boldsymbol{\alpha}\} dN_i(t)].$$

Then  $\Psi_\tau(\boldsymbol{\beta}; \boldsymbol{\alpha}) = n^{-1/2} \sum_{i=1}^n \zeta_i^\tau(\boldsymbol{\beta}; \boldsymbol{\alpha})$  and  $\mathbf{U}_\tau(\boldsymbol{\beta}; \boldsymbol{\alpha}) = n^{-1/2} \sum_{i=1}^n \ell_i^\tau(\boldsymbol{\beta}; \boldsymbol{\alpha})$ . Let  $\psi_\tau(\boldsymbol{\beta}; \boldsymbol{\alpha}) = E\{n^{-1/2} \Psi_\tau(\boldsymbol{\beta}; \boldsymbol{\alpha})\}$ , and  $\boldsymbol{\mu}_\tau(\boldsymbol{\beta}; \boldsymbol{\alpha}) = E\{n^{-1/2} \mathbf{U}_\tau(\boldsymbol{\beta}; \boldsymbol{\alpha})\}$ . Let  $f_{Y(t)}\{y|\mathbf{Z}(t)\}$  denote the conditional density function of  $Y(t)$  given  $\mathbf{Z}(t)$ .

We assume the following regularity conditions:

- C1. (a) There exists  $\gamma \in (0, 1)$  such that  $E[\int_0^\infty I\{\mathbf{X}(t)^\top \boldsymbol{\beta}_0(\gamma) > c\} \mathbf{X}(t)^{\otimes 2} \{dN^L(t) + I(L < t \leq R)\lambda_0(t)dt\}]$  is positive definite;
- (b) The conditional density function  $f_{Y(t)}\{y|\mathbf{Z}(t)\}$  is continuous and positive at  $y = \mathbf{X}(t)^\top \boldsymbol{\beta}_0(\tau)$  for any  $\tau \in [\gamma, \gamma']$ , where  $0 < \gamma < \gamma' < 1$ .
- C2.  $\boldsymbol{\beta}_0(\tau)$  is continuously differentiable in  $\tau$  and lies in the interior of a compact parameter space  $\mathcal{B}$  for all  $\tau \in [\gamma, \gamma']$ .
- C3. There exists a neighborhood of  $\boldsymbol{\alpha}_0$ , denoted by  $\mathcal{A}$ , such that

$$\frac{\partial \psi_\tau(\boldsymbol{\beta}; \boldsymbol{\alpha})}{\partial \boldsymbol{\alpha}} = E\left(\int_0^\infty \rho_\tau [Y(t) - \max\{c, \mathbf{X}(t)^\top \boldsymbol{\beta}\}] \{-\mathbf{h}(t)\} \exp\{-\mathbf{h}(t)^\top \boldsymbol{\alpha}\} dN(t)\right)$$

is bounded uniformly in  $\boldsymbol{\beta} \in \mathcal{B}$ ,  $\boldsymbol{\alpha} \in \mathcal{A}$ , and  $\tau \in [\gamma, \gamma']$ .

- C4.  $\zeta^\tau(\boldsymbol{\beta}; \boldsymbol{\alpha})$  has finite first and second moments for any  $\boldsymbol{\beta} \in \mathcal{B}$ ,  $\boldsymbol{\alpha} \in \mathcal{A}$ , and  $\tau \in [\gamma, \gamma']$ , where

$$\zeta^\tau(\boldsymbol{\beta}; \boldsymbol{\alpha}) = \int_0^\infty \rho_\tau [Y(t) - \max\{c, \mathbf{X}(t)^\top \boldsymbol{\beta}\}] [dN^L(t) + \exp\{-\mathbf{h}(t)^\top \boldsymbol{\alpha}\} dN(t)].$$

- C5. (a) The covariate space  $\mathcal{Z}$  is compact, that is,  $\sup_t \|\mathbf{Z}(t)\| < \infty$ , where  $\|\cdot\|$  stands for Euclidean norm;

(b)  $\sup_{\boldsymbol{\alpha} \in \mathcal{A}} \int_0^\infty \exp\{-\mathbf{h}(t)^\top \boldsymbol{\alpha}\} dN(t)$  is bounded;

(c)  $f_{Y(t)}\{\mathbf{X}(t)^\top \boldsymbol{\beta}_0(\tau)|\mathbf{Z}(t)\}$  is uniformly bounded for any  $\mathbf{Z}(t) \in \mathcal{Z}$  and  $\tau \in [\gamma, \gamma']$ ;

(d) For any  $d \geq 0$ , there exists a positive constant  $M^+$  such that

$$\sup_{\tau \in [\gamma, \gamma']} E \left| \int_0^\infty I\{|\mathbf{X}(t)^\top \boldsymbol{\beta}_0(\tau) - c| \leq \|\mathbf{X}(t)\|d\} \{dN^L(t) + I(L < t \leq R)\lambda_0(t)dt\} \right| \leq M^+ \cdot d;$$

(e)  $E \left[ \int_0^\infty \mathbf{h}(t) \exp \{ -\mathbf{h}(t)^\top \boldsymbol{\alpha} \} dN(t) \right]$  is uniformly bounded for  $\boldsymbol{\alpha} \in \mathcal{A}$ .

C6.  $\inf_{\tau \in [\gamma, \gamma']} \text{eigmin} \mathbf{B}_\tau(\boldsymbol{\beta}_0(\tau); \boldsymbol{\alpha}_0) > 0$ , where

$$\begin{aligned} \mathbf{B}_\tau(\boldsymbol{\beta}; \boldsymbol{\alpha}_0) &= \frac{\partial \boldsymbol{\mu}_\tau(\boldsymbol{\beta}; \boldsymbol{\alpha}_0)}{\partial \boldsymbol{\beta}} \\ &= E \left[ \int_0^\infty \mathbf{X}(t)^{\otimes 2} I \{ \mathbf{X}(t)^\top \boldsymbol{\beta} > c \} f_{Y(t)} \{ \mathbf{X}(t)^\top \boldsymbol{\beta} | \mathbf{X}(t) \} \{ dN^L(t) + I(L < t \leq R) \lambda_0(t) dt \} \right]. \end{aligned}$$

and  $\text{eigmin}(\cdot)$  denotes the minimum eigenvalue of a matrix.

The assumed regularity conditions are reasonable in real settings. Condition C1 is critical to ensure that  $\boldsymbol{\beta} = \boldsymbol{\beta}_0(\tau)$  is identifiable from the data and is a unique minimizer of  $\Psi_\tau(\boldsymbol{\beta}; \boldsymbol{\alpha}_0)$ . Condition C2 assumes the smoothness of  $\boldsymbol{\beta}_0(\tau)$ . By Condition C3, the variability associated with  $\hat{\boldsymbol{\alpha}}$  has only tractable impact on the estimation of  $\boldsymbol{\beta}_0(\tau)$ . Condition C4 is a trivial condition to attain the convergence of the proposed objective function  $\Psi_\tau(\boldsymbol{\beta}, \boldsymbol{\alpha})$  to some limit pointwisely in  $\tau$ . Condition C5 mainly requires the compactness of covariate space and some density functions. Such requirements are commonly seen in censored quantile regression literature. By Condition C6, matrix  $\mathbf{B}_\tau(\boldsymbol{\beta}_0(\tau); \boldsymbol{\alpha}_0)$  is invertible for all  $\tau \in [\gamma, 1)$ , and moreover its inverse matrix is uniformly bounded. This helps justify the tightness of the limit process of  $\sqrt{n}(\hat{\boldsymbol{\beta}}(\tau) - \boldsymbol{\beta}_0(\tau))$ . With Conditions C5 and C6, the arguments for the asymptotic distribution of the proposed estimator are much simplified.

Given that the intensity ratio weights in the proposed estimating equation involve  $\hat{\boldsymbol{\alpha}}$ , the large sample studies of  $\hat{\boldsymbol{\beta}}(\tau)$  need to be concerned with the asymptotic properties of  $\hat{\boldsymbol{\alpha}}$ . By following the arguments of Andersen and Gill (1982) with slightly stronger conditions imposed, we can show that  $\hat{\boldsymbol{\alpha}}$  converges to  $\boldsymbol{\alpha}_0$  almost surely and

$$\sqrt{n}(\hat{\boldsymbol{\alpha}} - \boldsymbol{\alpha}_0) + n^{-1/2} \mathbf{J}(\boldsymbol{\alpha}_0)^{-1} \sum_{i=1}^n \boldsymbol{\nu}_i(\boldsymbol{\alpha}_0) \xrightarrow{d} 0,$$

where

$$\mathbf{J}(\boldsymbol{\alpha}) = -E \left[ \frac{1}{n} \sum_{i=1}^n \int_0^\infty \left\{ \frac{\sum_{j=1}^n I(L_j < t \leq R_j) \mathbf{h}_j(t)^{\otimes 2} e^{\mathbf{h}_j(t)^\top \boldsymbol{\alpha}}}{\sum_{j=1}^n I(L_j < t \leq R_j) e^{\mathbf{h}_j(t)^\top \boldsymbol{\alpha}}} - \left( \frac{\sum_{j=1}^n I(L_j < t \leq R_j) \mathbf{h}_j(t) e^{\mathbf{h}_j(t)^\top \boldsymbol{\alpha}}}{\sum_{j=1}^n I(L_j < t \leq R_j) e^{\mathbf{h}_j(t)^\top \boldsymbol{\alpha}}} \right)^{\otimes 2} \right\} dN_i(t) \right] \quad (\text{A.1})$$

and

$$\boldsymbol{\nu}_i(\boldsymbol{\alpha}) = \int_0^\infty \left\{ \mathbf{h}_i(t) - \frac{\sum_{j=1}^n I(L_j < t \leq R_j) \mathbf{h}_j(t) e^{\mathbf{h}_j(t)^\top \boldsymbol{\alpha}}}{\sum_{j=1}^n I(L_j < t \leq R_j) e^{\mathbf{h}_j(t)^\top \boldsymbol{\alpha}}} \right\} \left( dN_i(t) - I(L_i < t \leq R_i) \lambda_0(t) e^{\mathbf{h}_i(t)^\top \boldsymbol{\alpha}} dt \right). \quad (\text{A.2})$$

These results on  $\hat{\boldsymbol{\alpha}}$  will be used in the proofs of both Theorems 1 and 2.

## Web Appendix B: Proof of Theorem 1

**Proof of Theorem 1:** Our first step is to prove that  $\psi_\tau(\boldsymbol{\beta}; \boldsymbol{\alpha}_0)$  has a unique minimizer at  $\boldsymbol{\beta} = \boldsymbol{\beta}_0(\tau)$ . Define  $\nu_\tau\{\boldsymbol{\beta}; \mathbf{Z}(t)\} = E(\rho_\tau[Y(t) - \max\{c, \mathbf{X}(t)^\top \boldsymbol{\beta}\}] | \mathbf{Z}(t))$ . We will show that  $\nu_\tau\{\boldsymbol{\beta}; \mathbf{Z}(t)\} \geq \nu_\tau\{\boldsymbol{\beta}_0(\tau); \mathbf{Z}(t)\}$  for any given  $\boldsymbol{\beta} \neq \boldsymbol{\beta}_0(\tau)$  by examining all possible situations listed below.

- (A) When  $\mathbf{X}(t)^\top \boldsymbol{\beta}_0(\tau) \leq c$  and  $\mathbf{X}(t)^\top \boldsymbol{\beta} \leq c$ ,  $\nu_\tau\{\boldsymbol{\beta}_0(\tau); \mathbf{Z}(t)\} = \nu_\tau\{\boldsymbol{\beta}; \mathbf{Z}(t)\}$ .  
 (B) When  $\mathbf{X}(t)^\top \boldsymbol{\beta}_0(\tau) \leq c$  and  $\mathbf{X}(t)^\top \boldsymbol{\beta} > c$ ,

$$\begin{aligned} & \nu_\tau\{\boldsymbol{\beta}_0(\tau); \mathbf{Z}(t)\} - \nu_\tau\{\boldsymbol{\beta}; \mathbf{Z}(t)\} \\ &= E [I\{Y(t) = c\}(\tau - 1) \{\mathbf{X}(t)^\top \boldsymbol{\beta} - c\} | \mathbf{Z}(t)] \\ & \quad + E [I\{c < Y(t) \leq \mathbf{X}(t)^\top \boldsymbol{\beta}\} [\tau \{\mathbf{X}(t)^\top \boldsymbol{\beta} - c\} + Y(t) - \mathbf{X}(t)^\top \boldsymbol{\beta}] | \mathbf{Z}(t)] \\ & \quad + E [I\{Y(t) > \mathbf{X}(t)^\top \boldsymbol{\beta}\} \tau \{\mathbf{X}(t)^\top \boldsymbol{\beta} - \tau\} | \mathbf{Z}(t)] \\ & \leq E [(I\{Y(t) = c\}(\tau - 1) + \tau I\{Y(t) > c\}) | \mathbf{Z}(t)] \{\mathbf{X}(t)^\top \boldsymbol{\beta} - c\}. \end{aligned}$$

Since  $\mathbf{X}(t)^\top \boldsymbol{\beta}_0(\tau) \leq c$ , we have that  $E[I\{Y(t) = c\} | \mathbf{Z}(t)] \geq \tau$  and  $E[I\{Y(t) > c\} | \mathbf{Z}(t)] \leq 1 - \tau$ . Therefore,  $\nu_\tau\{\boldsymbol{\beta}_0(\tau); \mathbf{Z}(t)\} - \nu_\tau\{\boldsymbol{\beta}; \mathbf{Z}(t)\} \leq 0$ .

(C) When  $\mathbf{X}(t)^\top \boldsymbol{\beta}_0(\tau) > c$ ,

$$\begin{aligned}
& \nu_\tau\{\boldsymbol{\beta}_0(\tau); \mathbf{Z}(t)\} - \nu_\tau\{\boldsymbol{\beta}; \mathbf{Z}(t)\} \\
&= (1 - \tau)P\{Y(t) \leq \mathbf{X}(t)^\top \boldsymbol{\beta}_0(\tau)\} [\mathbf{X}(t)^\top \boldsymbol{\beta}_0(\tau) - \max\{c, \mathbf{X}(t)^\top \boldsymbol{\beta}\}] \\
&\quad - \tau P\{Y(t) > \mathbf{X}(t)^\top \boldsymbol{\beta}_0(\tau)\} [\mathbf{X}(t)^\top \boldsymbol{\beta}_0(\tau) - \max\{c, \mathbf{X}(t)^\top \boldsymbol{\beta}\}] \\
&\quad + E\left(\int_{\max\{c, \mathbf{X}(t)^\top \boldsymbol{\beta}\}}^{\mathbf{X}(t)^\top \boldsymbol{\beta}_0(\tau)} [y - \max\{c, \mathbf{X}(t)^\top \boldsymbol{\beta}\}] f_{Y(t)}\{y|\mathbf{Z}(t)\} dy \middle| \mathbf{Z}(t)\right) \\
&= E\left(\int_{\max\{c, \mathbf{X}(t)^\top \boldsymbol{\beta}\}}^{\mathbf{X}(t)^\top \boldsymbol{\beta}_0(\tau)} [\max\{c, \mathbf{X}(t)^\top \boldsymbol{\beta}\} - y] f_{Y(t)}\{y|\mathbf{Z}(t)\} dy \middle| \mathbf{Z}(t)\right) \\
&\leq 0
\end{aligned} \tag{B.1}$$

When  $\mathbf{X}(t)^\top \boldsymbol{\beta} \neq \mathbf{X}(t)^\top \boldsymbol{\beta}_0(\tau)$ , we would have  $\max\{c, \mathbf{X}(t)^\top \boldsymbol{\beta}\} \neq \mathbf{X}(t)^\top \boldsymbol{\beta}_0(\tau)$ . Under condition C1(b), there must exist an interval between  $\max\{c, \mathbf{X}(t)^\top \boldsymbol{\beta}\}$  and  $\mathbf{X}(t)^\top \boldsymbol{\beta}_0(\tau)$  such that for any  $y$  in this interval,  $f_{Y(t)}\{y|\mathbf{Z}(t)\} > 0$  and  $[\max\{c, \mathbf{X}(t)^\top \boldsymbol{\beta}\} - y] f_{Y(t)}\{y|\mathbf{Z}(t)\} < 0$ , which would imply a strict inequality in (B.1). Hence, the equality in (B.1) holds if and only if  $\mathbf{X}(t)^\top \boldsymbol{\beta} = \mathbf{X}(t)^\top \boldsymbol{\beta}_0(\tau)$ .

Note that condition C1(a) implies that  $E[\int_0^\infty I\{\mathbf{X}(t)^\top \boldsymbol{\beta}_0(\tau) > c\} \mathbf{X}(t)^{\otimes 2} \{dN^L(t) + I(L < t \leq R)\lambda_0(t)dt\}]$  is positive definite for any  $\tau \in [\gamma, \gamma']$ . Hence, when  $\boldsymbol{\beta} \neq \boldsymbol{\beta}_0(\tau)$ ,

$$E\left[\int_0^\infty I\{\mathbf{X}(t)^\top \boldsymbol{\beta}_0(\tau) > c\} \{\mathbf{X}(t)^\top \boldsymbol{\beta} - \mathbf{X}(t)^\top \boldsymbol{\beta}_0(\tau)\}^2 \{dN^L(t) + I(L < t \leq R)\lambda_0(t)dt\}\right] > 0 \tag{B.2}$$

for  $\tau \in [\gamma, \gamma']$ . Because  $\nu_\tau\{\boldsymbol{\beta}_0(\tau); \mathbf{Z}(t)\} < \nu_\tau\{\boldsymbol{\beta}; \mathbf{Z}(t)\}$  when  $\mathbf{X}(t)^\top \boldsymbol{\beta}_0(\tau) > c$  and  $\mathbf{X}(t)^\top \boldsymbol{\beta} \neq \mathbf{X}(t)^\top \boldsymbol{\beta}_0(\tau)$ , (B.2) implies

$$E\left[\int_0^\infty I\{\mathbf{X}(t)^\top \boldsymbol{\beta}_0(\tau) > c\} [\nu_\tau\{\boldsymbol{\beta}; \mathbf{Z}(t)\} - \nu_\tau\{\boldsymbol{\beta}_0(\tau); \mathbf{Z}(t)\}] \{dN^L(t) + I(L < t \leq R)\lambda_0(t)dt\}\right]$$

is also greater than 0.

Given the result that  $\nu_\tau\{\boldsymbol{\beta}; \mathbf{Z}(t)\} \geq \nu_\tau\{\boldsymbol{\beta}_0(\tau); \mathbf{Z}(t)\}$  for any given  $\boldsymbol{\beta} \neq \boldsymbol{\beta}_0(\tau)$ , we then have

$$\begin{aligned}
& \psi_\tau(\boldsymbol{\beta}; \boldsymbol{\alpha}_0) - \psi_\tau\{\boldsymbol{\beta}_0(\tau); \boldsymbol{\alpha}_0\} \\
&= E\left(\int_0^\infty I\{\mathbf{X}(t)^\top \boldsymbol{\beta}_0(\tau) \leq c\} I\{\mathbf{X}(t)^\top \boldsymbol{\beta} \leq c\} [\nu_\tau\{\boldsymbol{\beta}; \mathbf{Z}(t)\} - \nu_\tau\{\boldsymbol{\beta}_0(\tau); \mathbf{Z}(t)\}] \right. \\
&\quad \left. \times \{dN^L(t) + I(L < t \leq R)\lambda_0(t)dt\}\right) \\
&+ E\left(\int_0^\infty I\{\mathbf{X}(t)^\top \boldsymbol{\beta}_0(\tau) \leq c\} I\{\mathbf{X}(t)^\top \boldsymbol{\beta} > c\} [\nu_\tau\{\boldsymbol{\beta}; \mathbf{Z}(t)\} - \nu_\tau\{\boldsymbol{\beta}_0(\tau); \mathbf{Z}(t)\}] \right. \\
&\quad \left. \times \{dN^L(t) + I(L < t \leq R)\lambda_0(t)dt\}\right) \\
&+ E\left(\int_0^\infty I\{\mathbf{X}(t)^\top \boldsymbol{\beta}_0(\tau) > c\} [\nu_\tau\{\boldsymbol{\beta}; \mathbf{Z}(t)\} - \nu_\tau\{\boldsymbol{\beta}_0(\tau); \mathbf{Z}(t)\}] \right. \\
&\quad \left. \times \{dN^L(t) + I(L < t \leq R)\lambda_0(t)dt\}\right) \\
&> 0
\end{aligned}$$

for any  $\boldsymbol{\beta} \neq \boldsymbol{\beta}_0(\tau)$ . Therefore, under condition C1, we prove that  $\boldsymbol{\beta}_0(\tau)$  is a unique minimizer of  $\psi_\tau(\boldsymbol{\beta}; \boldsymbol{\alpha}_0)$ .

Given  $\hat{\boldsymbol{\alpha}} \xrightarrow{a.s.} \boldsymbol{\alpha}_0$ , under condition C3, we have

$$\sup_{\tau \in [\gamma, \gamma'], \boldsymbol{\beta} \in \mathcal{B}} |\psi_\tau(\boldsymbol{\beta}; \hat{\boldsymbol{\alpha}}) - \psi_\tau(\boldsymbol{\beta}; \boldsymbol{\alpha}_0)| \xrightarrow{a.s.} 0. \quad (\text{B.3})$$

Note that

$$\begin{aligned}
\zeta_i^\tau(\boldsymbol{\beta}; \boldsymbol{\alpha}) &= \int_0^\infty \left( \tau [Y_i(t) - \max\{c, \mathbf{X}_i(t)^\top \boldsymbol{\beta}\}] \right. \\
&\quad - \tau I[Y_i(t) \leq \max\{c, \mathbf{X}_i(t)^\top \boldsymbol{\beta}\}] [Y_i(t) - \max\{c, \mathbf{X}_i(t)^\top \boldsymbol{\beta}\}] \\
&\quad \left. + (1 - \tau) I[Y_i(t) \leq \max\{c, \mathbf{X}_i(t)^\top \boldsymbol{\beta}\}] [\max\{c, \mathbf{X}_i(t)^\top \boldsymbol{\beta}\} - Y_i(t)] \right) \\
&\quad \times [dN_i^L(t) + \exp\{-\mathbf{h}_i(t)^\top \boldsymbol{\alpha}\} dN_i(t)]
\end{aligned}$$

These three terms in the parenthesis  $(\cdot)$  are either concave or convex functions of  $\boldsymbol{\beta}$  and linear in  $\tau$ , and  $\exp\{-\mathbf{h}_i(t)^\top \boldsymbol{\alpha}\}$  is an either concave or convex function of  $\boldsymbol{\alpha}$ . This fact coupled with pointwise convergence by the strong law of large numbers given condition C4,

implies the uniform convergence of  $n^{-1/2}\Psi_\tau(\boldsymbol{\beta}; \boldsymbol{\alpha})$  (Rockafellar, 1970 (Theorem 10.8)), i.e.

$$\sup_{\tau \in [\gamma, \gamma'], \boldsymbol{\beta} \in \mathcal{B}, \boldsymbol{\alpha} \in \mathcal{A}} |n^{-1/2}\Psi_\tau(\boldsymbol{\beta}; \boldsymbol{\alpha}) - \psi_\tau(\boldsymbol{\beta}; \boldsymbol{\alpha})| \xrightarrow{a.s.} 0.$$

This, coupled with (B.3), gives

$$\sup_{\boldsymbol{\beta} \in \mathcal{B}, \tau \in [\gamma, \gamma']} |n^{-1/2}\Psi_\tau(\boldsymbol{\beta}; \hat{\boldsymbol{\alpha}}) - \psi_\tau(\boldsymbol{\beta}; \boldsymbol{\alpha}_0)| \xrightarrow{a.s.} 0. \quad (\text{B.4})$$

With  $\psi_\tau\{\boldsymbol{\beta}_0(\tau); \boldsymbol{\alpha}_0\} = 0$  and  $\Psi_\tau\{\hat{\boldsymbol{\beta}}(\tau); \hat{\boldsymbol{\alpha}}\} = 0$ , some simple algebraic manipulation shows that

$$\sup_{\tau \in [\gamma, \gamma']} \left| \psi_\tau\{\hat{\boldsymbol{\beta}}(\tau); \boldsymbol{\alpha}_0\} - \psi_\tau\{\boldsymbol{\beta}_0(\tau); \boldsymbol{\alpha}_0\} \right| \leq \sup_{\tau \in [\gamma, \gamma']} \left| \psi_\tau\{\hat{\boldsymbol{\beta}}(\tau); \boldsymbol{\alpha}_0\} - n^{-1/2}\Psi_\tau\{\hat{\boldsymbol{\beta}}(\tau); \hat{\boldsymbol{\alpha}}\} \right|.$$

By (B.4), we then have

$$\sup_{\tau \in [\gamma, \gamma']} \left| \psi_\tau\{\hat{\boldsymbol{\beta}}(\tau); \boldsymbol{\alpha}_0\} - \psi_\tau\{\boldsymbol{\beta}_0(\tau); \boldsymbol{\alpha}_0\} \right| \xrightarrow{a.s.} 0. \quad (\text{B.5})$$

Based on (B.5), we can prove uniform strong convergence of  $\hat{\boldsymbol{\beta}}(\tau)$  by following similar arguments in the proof of theorem 3 in Huang and Peng (2009). Specifically, we need to prove that for any  $\epsilon > 0$ , there exists  $\delta > 0$  such that if  $\sup_{\tau \in [\gamma, \gamma']} |\psi_\tau\{\boldsymbol{\beta}(\tau); \boldsymbol{\alpha}_0\} - \psi_\tau\{\boldsymbol{\beta}_0(\tau); \boldsymbol{\alpha}_0\}| < \delta$ , then  $\sup_{\tau \in [\gamma, \gamma']} \|\boldsymbol{\beta}(\tau) - \boldsymbol{\beta}_0(\tau)\| < \epsilon$ . Suppose that this is not true. Then, there must exist a constant  $\epsilon^* > 0$ . For any  $\{\frac{1}{k} : k = 1, 2, \dots\}$ , there exists  $(\boldsymbol{\beta}_k, \tau_k)$  such that  $|\psi_{\tau_k}\{\boldsymbol{\beta}_k; \boldsymbol{\alpha}_0\} - \psi_{\tau_k}\{\boldsymbol{\beta}_0(\tau_k); \boldsymbol{\alpha}_0\}| < \frac{1}{k}$  but  $\|\boldsymbol{\beta}_k - \boldsymbol{\beta}_0(\tau_k)\| > \epsilon^*$ . Since  $\mathcal{B}$  is a compact space, there exists a subsequence of  $(\boldsymbol{\beta}_k, \tau_k)$  that converges to, say,  $(\boldsymbol{\beta}^*, \tau^*)$ . Then, we have that  $\psi_{\tau^*}(\boldsymbol{\beta}^*; \boldsymbol{\alpha}_0) = \psi_{\tau^*}\{\boldsymbol{\beta}_0(\tau^*); \boldsymbol{\alpha}_0\}$  but  $\|\boldsymbol{\beta}^* - \boldsymbol{\beta}_0(\tau^*)\| \geq \epsilon^*$ . This contradicts that  $\boldsymbol{\beta}_0(\tau^*)$  is a unique minimizer of  $\psi_{\tau^*}(\boldsymbol{\beta}; \boldsymbol{\alpha}_0)$ . Therefore, it is proved that for any  $\epsilon > 0$ , there exists  $\delta > 0$  such that if  $\sup_{\tau \in [\gamma, \gamma']} |\psi_\tau\{\boldsymbol{\beta}(\tau); \boldsymbol{\alpha}_0\} - \psi_\tau\{\boldsymbol{\beta}_0(\tau); \boldsymbol{\alpha}_0\}| < \delta$ , then  $\sup_{\tau \in [\gamma, \gamma']} \|\boldsymbol{\beta}(\tau) - \boldsymbol{\beta}_0(\tau)\| < \epsilon$ . Consequently, given  $\sup_{\tau \in [\gamma, \gamma']} \left| \psi_\tau\{\hat{\boldsymbol{\beta}}(\tau); \boldsymbol{\alpha}_0\} - \psi_\tau\{\boldsymbol{\beta}_0(\tau); \boldsymbol{\alpha}_0\} \right| \xrightarrow{a.s.} 0$ , it follows that  $\sup_{\tau \in [\gamma, \gamma']} \|\hat{\boldsymbol{\beta}}(\tau) - \boldsymbol{\beta}_0(\tau)\| \xrightarrow{a.s.} 0$ . The proof of Theorem 1 is completed.

## Web Appendix C: Proof of Theorem 2

### Lemma 1.

$$\sup_{\tau \in [\gamma, \gamma']} \left\| \mathbf{U}_\tau \left\{ \hat{\boldsymbol{\beta}}(\tau); \hat{\boldsymbol{\alpha}} \right\} - \mathbf{U}_\tau \left\{ \boldsymbol{\beta}_0(\tau); \boldsymbol{\alpha}_0 \right\} - n^{1/2} \left[ \boldsymbol{\mu}_\tau \left\{ \hat{\boldsymbol{\beta}}(\tau); \hat{\boldsymbol{\alpha}} \right\} - \boldsymbol{\mu}_\tau \left\{ \boldsymbol{\beta}_0(\tau); \boldsymbol{\alpha}_0 \right\} \right] \right\| \xrightarrow{p} 0.$$

### Proof of Lemma 1:

This lemma can be proved by using the results in Alexander (1984) and the arguments for theorem 1 of Lai and Ying (1988). We only need to show that

$$\sup_{\tau \in [\gamma, \gamma']} \text{Var} \left[ \boldsymbol{\ell}_i^\tau \left\{ \hat{\boldsymbol{\beta}}(\tau); \hat{\boldsymbol{\alpha}} \right\} - \boldsymbol{\ell}_i^\tau \left\{ \boldsymbol{\beta}_0(\tau); \boldsymbol{\alpha}_0 \right\} \right] \xrightarrow{p} 0. \quad (\text{C.1})$$

Under condition C5(a) and (b), there exists a finite number  $M_1$  such that when  $\hat{\boldsymbol{\alpha}} \in \mathcal{A}$ ,

$$\begin{aligned} & \sup_{\tau \in [\gamma, \gamma']} \text{Var} \left[ \boldsymbol{\ell}_i^\tau \left\{ \hat{\boldsymbol{\beta}}(\tau); \hat{\boldsymbol{\alpha}} \right\} - \boldsymbol{\ell}_i^\tau \left\{ \boldsymbol{\beta}_0(\tau); \boldsymbol{\alpha}_0 \right\} \right] \\ & \leq E \left[ \boldsymbol{\ell}_i^\tau \left\{ \hat{\boldsymbol{\beta}}(\tau); \hat{\boldsymbol{\alpha}} \right\} - \boldsymbol{\ell}_i^\tau \left\{ \boldsymbol{\beta}_0(\tau); \boldsymbol{\alpha}_0 \right\} \right]^2 \\ & \leq M_1 \cdot \sup_{\tau \in [\gamma, \gamma']} E \left\| \boldsymbol{\ell}_i^\tau \left\{ \hat{\boldsymbol{\beta}}(\tau); \hat{\boldsymbol{\alpha}} \right\} - \boldsymbol{\ell}_i^\tau \left\{ \boldsymbol{\beta}_0(\tau); \boldsymbol{\alpha}_0 \right\} \right\| \\ & \leq M_1 \cdot \sup_{\tau \in [\gamma, \gamma']} E \left\| \int_0^\infty \mathbf{X}_i(t) I \left\{ \mathbf{X}_i(t)^\top \hat{\boldsymbol{\beta}}(\tau) > c \right\} I \left\{ \mathbf{X}_i(t)^\top \boldsymbol{\beta}_0(\tau) > c \right\} \right. \\ & \quad \times \left[ I \left\{ Y_i(t) \leq \mathbf{X}_i(t)^\top \hat{\boldsymbol{\beta}}(\tau) \right\} - I \left\{ Y_i(t) \leq \mathbf{X}_i(t)^\top \boldsymbol{\beta}_0(\tau) \right\} \right] \left. \left\{ dN_i^L(t) + I(L_i < t \leq R_i) \lambda_0(t) dt \right\} \right\| \\ & + M_1 \cdot \sup_{\tau \in [\gamma, \gamma']} E \left\| \int_0^\infty \mathbf{X}_i(t) I \left\{ \mathbf{X}_i(t)^\top \hat{\boldsymbol{\beta}}(\tau) > c \right\} I \left\{ \mathbf{X}_i(t)^\top \boldsymbol{\beta}_0(\tau) \leq c \right\} \right. \\ & \quad \times \left[ I \left\{ Y_i(t) \leq \mathbf{X}_i(t)^\top \hat{\boldsymbol{\beta}}(\tau) \right\} - \tau \right] \left. \left\{ dN_i^L(t) + I(L_i < t \leq R_i) \lambda_0(t) dt \right\} \right\| \\ & + M_1 \cdot \sup_{\tau \in [\gamma, \gamma']} E \left\| \int_0^\infty \mathbf{X}_i(t) \left\{ \mathbf{X}_i(t)^\top \hat{\boldsymbol{\beta}}(\tau) \leq c \right\} I \left\{ \mathbf{X}_i(t)^\top \boldsymbol{\beta}_0(\tau) > c \right\} \right. \\ & \quad \times \left[ I \left\{ Y_i(t) \leq \mathbf{X}_i(t)^\top \boldsymbol{\beta}_0(\tau) \right\} - \tau \right] \left. \left\{ dN_i^L(t) + I(L_i < t \leq R_i) \lambda_0(t) dt \right\} \right\| \\ & + M_1 \cdot \sup_{\tau \in [\gamma, \gamma']} E \left\| \int_0^\infty \mathbf{X}_i(t) I \left\{ \mathbf{X}_i(t)^\top \hat{\boldsymbol{\beta}}(\tau) > c \right\} \left[ I \left\{ Y_i(t) \leq \mathbf{X}_i(t)^\top \hat{\boldsymbol{\beta}}(\tau) \right\} - \tau \right] \right. \\ & \quad \times \left. \left[ \exp \left\{ -\mathbf{h}_i(t)^\top \boldsymbol{\alpha}_0 \right\} - \exp \left\{ -\mathbf{h}_i(t)^\top \hat{\boldsymbol{\alpha}} \right\} \right] dN_i(t) \right\| \\ & = (I) + (II) + (III) + (IV) \end{aligned}$$



Under condition C5(a) - (c) and Theorem 1,

$$(I) \leq M_1 \cdot \sup_{\tau \in [\gamma, \gamma']} E \left\| \left[ \int_0^\infty \mathbf{X}_i(t)^{\otimes 2} I \{ \mathbf{X}_i(t)^\top \boldsymbol{\beta} > c \} I \{ \mathbf{X}_i(t)^\top \boldsymbol{\beta}_0(\tau) > c \} f_{Y_i(t)} \{ \mathbf{X}_i(t)^\top \boldsymbol{\beta}_0(\tau) | \mathbf{Z}_i(t) \} \right. \right. \\ \left. \left. \times \{ dN_i^L(t) + I(L_i < t \leq R_i) \lambda_0(t) dt \} + o_p(1) \right] \left\{ \hat{\boldsymbol{\beta}}(\tau) - \boldsymbol{\beta}_0(\tau) \right\} \right\| \\ \xrightarrow{p} 0.$$

When  $\{ \mathbf{X}_i(t)^\top \hat{\boldsymbol{\beta}}(\tau) - c \} \{ \mathbf{X}_i(t)^\top \boldsymbol{\beta}_0(\tau) - c \} \leq 0$ , it is easy to see that  $|\mathbf{X}_i(t)^\top \boldsymbol{\beta}_0(\tau) - c| \leq |\mathbf{X}_i(t)^\top \boldsymbol{\beta}_0(\tau) - \mathbf{X}_i(t)^\top \hat{\boldsymbol{\beta}}(\tau)| \leq \|\mathbf{X}_i(t)\| \|\boldsymbol{\beta}_0(\tau) - \hat{\boldsymbol{\beta}}(\tau)\|$ . Under condition C5(a), (b), and (d) and Theorem 1,

$$(II) \leq \sup_{\tau \in [\gamma, \gamma']} E \left\| \int_0^\infty \mathbf{X}_i(t) I \left\{ |\mathbf{X}_i(t)^\top \boldsymbol{\beta}_0(\tau) - c| \leq \|\mathbf{X}_i(t)\| \|\boldsymbol{\beta}_0(\tau) - \hat{\boldsymbol{\beta}}(\tau)\| \right\} \right. \\ \left. \times \left[ I \left\{ Y_i(t) \leq \mathbf{X}_i(t)^\top \hat{\boldsymbol{\beta}}(\tau) \right\} - \tau \right] \left\{ dN_i^L(t) + I(L_i < t \leq R_i) \lambda_0(t) dN_i(t) \right\} \right\| \\ \xrightarrow{p} 0.$$

Similarly, it can be shown that (III)  $\xrightarrow{p} 0$ .

Under condition C5(a) and (e) and the consistency of  $\hat{\boldsymbol{\alpha}}$ ,

$$(IV) \leq M_1 \cdot \sup_{\tau \in [\gamma, \gamma']} \left\| \int_0^\infty \mathbf{X}_i(t) I \left\{ \mathbf{X}_i(t)^\top \hat{\boldsymbol{\beta}}(\tau) > c \right\} \left[ I \left\{ Y_i(t) \leq \mathbf{X}_i(t)^\top \hat{\boldsymbol{\beta}}(\tau) \right\} - \tau \right] \right. \\ \left. \times \mathbf{h}_i(t) \exp(-\mathbf{h}_i(t)^\top \boldsymbol{\alpha}_0) dN_i(t) \right\| \|\hat{\boldsymbol{\alpha}} - \boldsymbol{\alpha}_0\| \\ \xrightarrow{p} 0.$$

Therefore, we prove (C.1) and hence complete the proof of Lemma 1.

**Proof of Theorem 2:** According to Lemma 1 and  $\mathbf{U}_\tau \{\hat{\boldsymbol{\beta}}(\tau); \hat{\boldsymbol{\alpha}}\} = \mathbf{0}$ , we have

$$\begin{aligned} & -\mathbf{U}_\tau \{\boldsymbol{\beta}_0(\tau); \boldsymbol{\alpha}_0\} \\ &= n^{1/2} \left\{ \boldsymbol{\mu}_\tau(\hat{\boldsymbol{\beta}}; \hat{\boldsymbol{\alpha}}) - \boldsymbol{\mu}_\tau(\boldsymbol{\beta}_0; \boldsymbol{\alpha}_0) \right\} + o_{p:\tau \in [\gamma, \gamma']}(1) \\ &= [\mathbf{B}_\tau \{\boldsymbol{\beta}_0(\tau); \boldsymbol{\alpha}_0\} + o_p(1)] \cdot n^{1/2} \left\{ \hat{\boldsymbol{\beta}}(\tau) - \boldsymbol{\beta}_0(\tau) \right\} + \mathbf{A}_\tau \{\boldsymbol{\beta}_0(\tau); \boldsymbol{\alpha}_0\} \cdot n^{1/2} \left\{ \hat{\boldsymbol{\alpha}}(\tau) - \boldsymbol{\alpha}_0(\tau) \right\} \\ & \quad + o_{p:\tau \in [\gamma, \gamma']}(1) \end{aligned}$$

where

$$\begin{aligned} \mathbf{A}_\tau(\boldsymbol{\beta}; \boldsymbol{\alpha}) &= \frac{\partial \boldsymbol{\mu}_\tau(\boldsymbol{\beta}; \boldsymbol{\alpha})}{\partial \boldsymbol{\alpha}} = - \int_0^\infty \mathbf{X}_i(t) I \{ \mathbf{X}_i(t)^\top \boldsymbol{\beta} > c \} [I \{ Y_i(t) \leq \mathbf{X}_i(t)^\top \boldsymbol{\beta} \} - \tau] \\ & \quad \mathbf{h}_i(t)^\top \exp \{ -\mathbf{h}_i(t)^\top \boldsymbol{\alpha} \} dN_i(t), \quad (\text{C.2}) \end{aligned}$$

and  $o_{p:\tau \in [\gamma, \gamma']}(1)$  means uniform convergence in probability to zero over  $\tau \in [\gamma, \gamma']$ .

Under condition C6,

$$\begin{aligned} & n^{1/2} \left\{ \hat{\boldsymbol{\beta}}(\tau) - \boldsymbol{\beta}_0(\tau) \right\} \\ &= -\mathbf{B}_\tau \{\boldsymbol{\beta}_0(\tau); \boldsymbol{\alpha}_0\}^{-1} \left[ \mathbf{U}_\tau \{\boldsymbol{\beta}_0(\tau); \boldsymbol{\alpha}_0\} + \mathbf{A}_\tau \{\boldsymbol{\beta}_0(\tau); \boldsymbol{\alpha}_0\} \cdot n^{1/2} \left\{ \hat{\boldsymbol{\alpha}}(\tau) - \boldsymbol{\alpha}_0(\tau) \right\} \right] + o_{p:\tau \in [\gamma, \gamma']}(1) \end{aligned}$$

Therefore,

$$\begin{aligned} n^{1/2} \left\{ \hat{\boldsymbol{\beta}}(\tau) - \boldsymbol{\beta}_0(\tau) \right\} &= n^{-1/2} \sum_{i=1}^n \left[ -\mathbf{B}_\tau \{\boldsymbol{\beta}_0(\tau); \boldsymbol{\alpha}_0\}^{-1} \boldsymbol{\ell}_i^\tau \{\boldsymbol{\beta}_0(\tau); \boldsymbol{\alpha}_0\} \right. \\ & \quad \left. + \mathbf{B}_\tau \{\boldsymbol{\beta}_0(\tau); \boldsymbol{\alpha}_0\}^{-1} \mathbf{A}_\tau \{\boldsymbol{\beta}_0(\tau); \boldsymbol{\alpha}_0\} \mathbf{J}(\boldsymbol{\alpha}_0)^{-1} \boldsymbol{\nu}_i(\boldsymbol{\alpha}_0) \right] + o_{p:\tau \in [\gamma, \gamma']}(1). \end{aligned}$$

According to the definition of quantile and the quantile regression model assumption,  $\mathbf{X}_i(t)^\top \boldsymbol{\beta}_0(\tau)$  increases in  $\tau$ . Since  $\int_0^\infty \tau \mathbf{X}_i(t) I \{ \mathbf{X}_i(t)^\top \boldsymbol{\beta}_0(\tau) > c \} [dN_i^L(t) + \exp\{-\mathbf{h}_i(t)^\top \boldsymbol{\alpha}_0\} dN_i(t)]$  and  $\int_0^\infty \mathbf{X}_i(t) I \{ \mathbf{X}_i(t)^\top \boldsymbol{\beta}_0(\tau) > c \} I \{ Y_i(t) \leq \mathbf{X}_i(t)^\top \boldsymbol{\beta}_0(\tau) \} [dN_i^L(t) + \exp\{-\mathbf{h}_i(t)^\top \boldsymbol{\alpha}_0\} dN_i(t)]$  are bounded and monotone functions on  $\tau \in [\gamma, \gamma']$ ,  $\{\boldsymbol{\ell}_i^\tau(\boldsymbol{\beta}_0(\tau); \boldsymbol{\alpha}_0) : \tau \in [\gamma, \gamma']\}$  is a Donsker class. By Donsker theorem and pointwise central limit theory,  $n^{1/2} \left\{ \hat{\boldsymbol{\beta}}(\tau) - \boldsymbol{\beta}_0(\tau) \right\}$  converges weakly to a Gaussian process with covariance matrix  $\boldsymbol{\Sigma}(\tau_1, \tau_2)$  for  $\tau \in [\gamma, \gamma']$ , where

$$\boldsymbol{\Sigma}(\tau_1, \tau_2) = E \left\{ \boldsymbol{\xi}_i(\tau_1) \boldsymbol{\xi}_i(\tau_2)^\top \right\} \quad (\text{C.3})$$

with

$$\boldsymbol{\xi}_i(\tau) = -\mathbf{B}_\tau \{\boldsymbol{\beta}_0(\tau); \boldsymbol{\alpha}_0\}^{-1} \boldsymbol{\ell}_i^\tau \{\boldsymbol{\beta}_0(\tau); \boldsymbol{\alpha}_0\} + \mathbf{B}_\tau \{\boldsymbol{\beta}_0(\tau); \boldsymbol{\alpha}_0\}^{-1} \mathbf{A}_\tau \{\boldsymbol{\beta}_0(\tau); \boldsymbol{\alpha}_0\} \mathbf{J}(\boldsymbol{\alpha}_0)^{-1} \boldsymbol{\iota}_i(\boldsymbol{\alpha}_0).$$

## Web Appendix D: Additional Simulation Results

### *Simulation results for larger $\tau$ 's*

Table F.1 present simulation results for Case 1 and Case 2 with  $\tau = 0.85, 0.90, 0.95$  when  $n = 200$ .

[Table 1 about here.]

### *Simulation results with $n = 400$*

Simulation results with  $n = 400$  are presented in Table F.2.

[Table 2 about here.]

### *Robustness studies*

We also investigated the robustness of the proposed estimation of model (1) to the potential mis-specification of the model for the follow-up time process. We consider three different scenarios of model mis-specification:

S1. The true follow-up intensity model is

$$P\{dN_i(t) = 1 | \mathcal{H}_i(t)\} = I(L_i < t \leq R_i) v_i 0.2t \exp\{a_0 Y_i(t^-)\} dt,$$

which involves a subject-specific frailty  $v_i$  that follows *Gamma*(2, 0.5) distribution but is not considered in the assumed model (7).

S2. The true follow-up intensity model is

$$P\{dN_i(t) = 1 | \mathcal{H}_i(t)\} = I(L_i \leq t \leq R_i) 0.2t \exp\{a_0 Y_i(t^-) + a_1 Z_{i3}\} dt,$$

which contains a covariate  $Z_{i3}$  not included in the assumed model (7). We set  $a_1$  as 0.5 or 1.

Here  $Z_{i3} \sim \text{Bernoulli}(0.5)$ .

S3. The follow-up process does not follow a proportional intensity but a log-linear gap time model, by which, the gap times are generated by  $Gamma(2, 0.5) \times \exp\{-0.2Y_i(t^-)\}$ .

We performed the proposed estimation of model (1) assuming model (2) is the true model for the follow-up time process. In Tables F.3–F.5, we present the empirical bias and standard deviations of the proposed estimator along with those of the naive estimator which ignores outcome-dependent follow-up. The proposed estimator always has much smaller bias compared to that of the naive estimator. In Scenario S1, the magnitude of the empirical bias is mostly less than 10% of that of the true coefficient. In Scenario S2, when  $a_1 = 0.5$  and  $\tau = 0.25$  or  $0.5$ , the bias of the proposed estimator is only slightly larger than the empirical bias observed in the case with correctly specified follow-up model. As expected, as  $a_1$  is increased to postulate a larger departure from the assumed model, the bias of the proposed estimator becomes larger. When the type of the follow-up model is mis-specified, as in Scenario S3, the proposed estimator presents bias consistently across small or large  $\tau$ 's. The magnitudes of bias are not striking though, even smaller than those observed in Scenario S1.

[Table 3 about here.]

[Table 4 about here.]

[Table 5 about here.]

### **Web Appendix E: Additional Data Analyses for PBB Study**

In Tables F.6 and F.7, we present the analysis results based on the visit time model that includes BMI as an additional covariate. In Tables F.8 and F.9, we present the results with the visit time model with the covariate chosen as the discretized initial PBB variable.

[Table 6 about here.]

[Table 7 about here.]

[Table 8 about here.]

[Table 9 about here.]

### **Web Appendix F: Histogram of Visit Gap Times**

The histogram of the gap times between adjacent visits is provided in Figure F.1.

[Figure 1 about here.]

## References

- Alexander, K. S. (1984). Probability inequalities for empirical processes and a law of the iterated logarithm. *The Annals of Probability* **12**, 1041–1067.
- Andersen, P. K. and Gill, R. D. (1982). Cox's regression model for counting process: a large sample study. *The Annals of Statistics* **10**, 1100–1120.
- Huang, Y. and Peng, L. (2009). Accelerated recurrence time models. *Scandinavian Journal of Statistics* **36**, 636–648.
- Lai, T. L. and Ying, Z. (1988). Stochastic integrals of empirical-type processes with applications to censored regression. *Journal of Multivariate Analysis* **27**, 334–358.

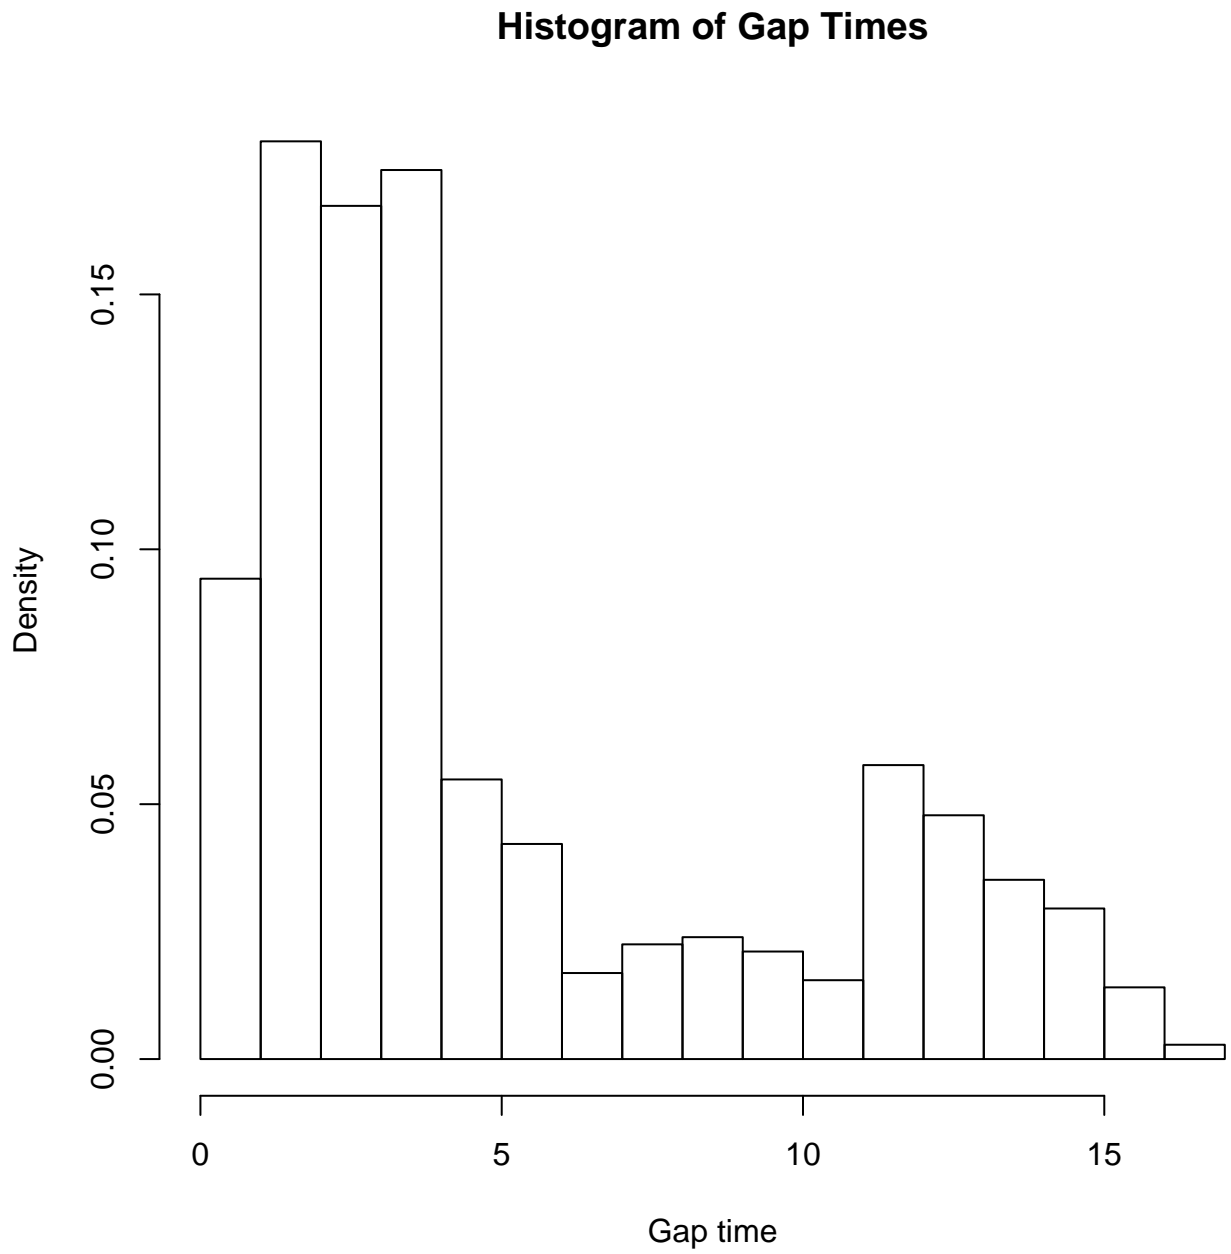

**Figure F.1:** Distribution of the gap times between adjacent visits.

Table F.1: Simulation studies that compared the proposed method and the naive approach: EmpSD – empirical standard deviation; AvgSD – the average of standard deviation estimates; Cov95 – the coverage rate of a 95% confidence interval.

| Effect        | True   | Naive  |       | Proposed |       |               |       |              |       |
|---------------|--------|--------|-------|----------|-------|---------------|-------|--------------|-------|
|               |        | Bias   | EmpSD | Bias     | EmpSD | Bootstrapping |       | Sample-based |       |
|               |        |        |       |          |       | AvgSD         | Cov95 | AvgSD        | Cov95 |
| Case 1        |        |        |       |          |       |               |       |              |       |
| $\tau = 0.85$ |        |        |       |          |       |               |       |              |       |
| Intercept     | 5.018  | -0.063 | 0.171 | -0.003   | 0.162 | 0.174         | 0.96  | 0.246        | 0.94  |
| $Z_1$         | -0.482 | 0.124  | 0.340 | -0.007   | 0.307 | 0.325         | 0.96  | 0.471        | 0.94  |
| $Z_2$         | 1.518  | 0.142  | 0.220 | 0.002    | 0.197 | 0.205         | 0.94  | 0.204        | 0.93  |
| $t$           | -1     | 0.024  | 0.031 | -0.001   | 0.029 | 0.033         | 0.98  | 0.037        | 0.97  |
| $\tau = 0.9$  |        |        |       |          |       |               |       |              |       |
| Intercept     | 5.141  | -0.061 | 0.189 | -0.004   | 0.173 | 0.190         | 0.96  | 1.637        | 0.97  |
| $Z_1$         | -0.359 | 0.126  | 0.383 | -0.004   | 0.330 | 0.354         | 0.96  | 1.209        | 0.96  |
| $Z_2$         | 1.641  | 0.144  | 0.250 | 0.002    | 0.219 | 0.225         | 0.94  | 1.721        | 0.97  |
| $t$           | -1     | 0.024  | 0.034 | -0.001   | 0.031 | 0.036         | 0.98  | 0.056        | 0.98  |
| $\tau = 0.95$ |        |        |       |          |       |               |       |              |       |
| Intercept     | 5.322  | -0.057 | 0.234 | -0.005   | 0.208 | 0.230         | 0.96  | 2.340        | 0.98  |
| $Z_1$         | -0.178 | 0.115  | 0.489 | -0.007   | 0.396 | 0.418         | 0.96  | 1.915        | 0.96  |
| $Z_2$         | 1.822  | 0.134  | 0.303 | -0.0006  | 0.260 | 0.267         | 0.94  | 2.073        | 0.96  |
| $t$           | -1     | 0.025  | 0.043 | -0.0007  | 0.039 | 0.043         | 0.99  | 0.071        | 0.98  |
| Case 2        |        |        |       |          |       |               |       |              |       |
| $\tau = 0.85$ |        |        |       |          |       |               |       |              |       |
| Intercept     | 5.003  | -0.063 | 0.248 | 0.0003   | 0.215 | 0.266         | 0.94  | 0.347        | 0.93  |
| $Z_1$         | -0.497 | 0.155  | 0.502 | -0.002   | 0.401 | 0.507         | 0.93  | 0.653        | 0.94  |
| $Z_2$         | 1.503  | 0.187  | 0.305 | 0.002    | 0.249 | 0.322         | 0.93  | 0.263        | 0.93  |
| $t$           | -1     | 0.037  | 0.043 | 0.0002   | 0.040 | 0.048         | 0.93  | 0.051        | 0.96  |
| $\tau = 0.9$  |        |        |       |          |       |               |       |              |       |
| Intercept     | 5.170  | -0.062 | 0.304 | 0.003    | 0.257 | 0.316         | 0.92  | 1.480        | 0.98  |
| $Z_1$         | -0.330 | 0.174  | 0.618 | -0.003   | 0.476 | 0.602         | 0.92  | 1.472        | 0.96  |
| $Z_2$         | 1.670  | 0.219  | 0.380 | 0.004    | 0.291 | 0.392         | 0.92  | 1.546        | 0.95  |
| $t$           | -1     | 0.038  | 0.050 | 0.0001   | 0.045 | 0.057         | 0.95  | 0.074        | 0.98  |
| $\tau = 0.95$ |        |        |       |          |       |               |       |              |       |
| Intercept     | 5.438  | -0.047 | 0.440 | 0.010    | 0.339 | 0.403         | 0.92  | 2.209        | 0.97  |
| $Z_1$         | -0.062 | 0.196  | 0.894 | -0.007   | 0.619 | 0.751         | 0.91  | 2.119        | 0.97  |
| $Z_2$         | 1.938  | 0.248  | 0.549 | 0.017    | 0.389 | 0.495         | 0.91  | 2.048        | 0.97  |
| $t$           | -1     | 0.037  | 0.067 | -0.006   | 0.058 | 0.073         | 0.96  | 0.099        | 0.98  |



Table F.2: Simulation studies ( $n = 400$ ) that compared the proposed method and the naive approach: EmpSD – empirical standard deviation; AvgSD – the average of standard deviation estimates; Cov95 – the coverage rate of a 95% confidence interval.

| Effect        | True   | Naive  |       | Proposed |       |               |       |              |       |
|---------------|--------|--------|-------|----------|-------|---------------|-------|--------------|-------|
|               |        | Bias   | EmpSD | Bias     | EmpSD | Bootstrapping |       | Sample-based |       |
|               |        |        |       |          |       | AvgSD         | Cov95 | AvgSD        | Cov95 |
| Case 1        |        |        |       |          |       |               |       |              |       |
| $\tau = 0.25$ |        |        |       |          |       |               |       |              |       |
| Intercept     | 4.163  | -0.075 | 0.135 | -0.008   | 0.115 | 0.119         | 0.96  | 0.129        | 0.95  |
| $Z_1$         | -1.337 | 0.146  | 0.253 | 0.018    | 0.217 | 0.225         | 0.95  | 0.239        | 0.95  |
| $Z_2$         | 0.663  | 0.121  | 0.169 | 0.004    | 0.127 | 0.132         | 0.95  | 0.137        | 0.95  |
| $t$           | -1     | 0.033  | 0.040 | 4e-4     | 0.025 | 0.028         | 0.97  | 0.035        | 0.98  |
| $\tau = 0.5$  |        |        |       |          |       |               |       |              |       |
| Intercept     | 4.5    | -0.067 | 0.125 | -0.006   | 0.102 | 0.106         | 0.95  | 0.111        | 0.94  |
| $Z_1$         | -1     | 0.139  | 0.242 | 0.019    | 0.194 | 0.200         | 0.95  | 0.206        | 0.94  |
| $Z_2$         | 1      | 0.124  | 0.170 | -0.004   | 0.114 | 0.120         | 0.95  | 0.121        | 0.95  |
| $t$           | -1     | 0.028  | 0.034 | -5e-4    | 0.020 | 0.022         | 0.97  | 0.024        | 0.97  |
| $\tau = 0.75$ |        |        |       |          |       |               |       |              |       |
| Intercept     | 4.837  | -0.061 | 0.125 | -0.003   | 0.106 | 0.110         | 0.95  | 0.114        | 0.95  |
| $Z_1$         | -0.663 | 0.127  | 0.247 | 0.008    | 0.200 | 0.207         | 0.96  | 0.208        | 0.94  |
| $Z_2$         | 1.337  | 0.135  | 0.189 | -0.004   | 0.127 | 0.129         | 0.95  | 0.129        | 0.93  |
| $t$           | -1     | 0.025  | 0.032 | -0.001   | 0.019 | 0.021         | 0.97  | 0.023        | 0.96  |
| Case 2        |        |        |       |          |       |               |       |              |       |
| $\tau = 0.25$ |        |        |       |          |       |               |       |              |       |
| Intercept     | 4.134  | -0.024 | 0.091 | 0.005    | 0.084 | 0.088         | 0.95  | 0.094        | 0.95  |
| $Z_1$         | -1.366 | 0.054  | 0.171 | -6e-4    | 0.154 | 0.157         | 0.95  | 0.165        | 0.94  |
| $Z_2$         | 0.634  | 0.056  | 0.112 | 5e-4     | 0.087 | 0.092         | 0.96  | 0.094        | 0.95  |
| $t$           | -1     | 0.021  | 0.029 | -7e-4    | 0.020 | 0.022         | 0.98  | 0.025        | 0.96  |
| $\tau = 0.5$  |        |        |       |          |       |               |       |              |       |
| Intercept     | 4.418  | -0.042 | 0.110 | 0.006    | 0.097 | 0.101         | 0.95  | 0.104        | 0.95  |
| $Z_1$         | -1.082 | 0.109  | 0.214 | -0.002   | 0.176 | 0.182         | 0.94  | 0.187        | 0.93  |
| $Z_2$         | 0.918  | 0.092  | 0.152 | 0.002    | 0.106 | 0.109         | 0.96  | 0.109        | 0.94  |
| $t$           | -1     | 0.026  | 0.032 | -0.001   | 0.019 | 0.021         | 0.97  | 0.023        | 0.96  |
| $\tau = 0.75$ |        |        |       |          |       |               |       |              |       |
| Intercept     | 4.777  | -0.053 | 0.144 | 0.007    | 0.124 | 0.133         | 0.96  | 0.137        | 0.95  |
| $Z_1$         | -0.723 | 0.136  | 0.295 | -0.001   | 0.230 | 0.237         | 0.96  | 0.240        | 0.94  |
| $Z_2$         | 1.277  | 0.139  | 0.220 | -0.005   | 0.144 | 0.145         | 0.95  | 0.143        | 0.93  |
| $t$           | -1     | 0.034  | 0.040 | -0.001   | 0.023 | 0.025         | 0.97  | 0.027        | 0.96  |

Table F.3: Robustness study with  $n = 200$  based on 1000 replications: Scenario S1

| Effect    | Case 1        |        |       |          |       | Case 2        |        |       |          |       |
|-----------|---------------|--------|-------|----------|-------|---------------|--------|-------|----------|-------|
|           | True          | Naive  |       | Proposed |       | True          | Naive  |       | Proposed |       |
|           |               | Bias   | SD    | Bias     | SD    |               | Bias   | SD    | Bias     | SD    |
|           | $\tau = 0.25$ |        |       |          |       | $\tau = 0.25$ |        |       |          |       |
| Intercept | 4.163         | -0.068 | 0.159 | -0.054   | 0.159 | 4.134         | -0.034 | 0.017 | -0.023   | 0.016 |
| $Z_1$     | -1.337        | 0.122  | 0.315 | 0.093    | 0.317 | -1.366        | 0.070  | 0.061 | 0.049    | 0.056 |
| $Z_2$     | 0.663         | 0.125  | 0.185 | 0.095    | 0.185 | 0.634         | 0.070  | 0.024 | 0.048    | 0.021 |
| $t$       | -1            | 0.035  | 0.032 | 0.028    | 0.032 | -1            | 0.023  | 0.001 | 0.016    | 0.001 |
|           | $\tau = 0.5$  |        |       |          |       | $\tau = 0.5$  |        |       |          |       |
| Intercept | 4.500         | -0.062 | 0.153 | -0.047   | 0.153 | 4.418         | -0.049 | 0.029 | -0.035   | 0.026 |
| $Z_1$     | -1            | 0.119  | 0.302 | 0.088    | 0.300 | -1.082        | 0.107  | 0.106 | 0.076    | 0.093 |
| $Z_2$     | 1             | 0.132  | 0.182 | 0.100    | 0.177 | 0.918         | 0.109  | 0.044 | 0.076    | 0.034 |
| $t$       | -1            | 0.029  | 0.028 | 0.022    | 0.028 | -1            | 0.027  | 0.002 | 0.019    | 0.001 |
|           | $\tau = 0.75$ |        |       |          |       | $\tau = 0.75$ |        |       |          |       |
| Intercept | 4.837         | -0.060 | 0.171 | -0.045   | 0.163 | 4.777         | -0.060 | 0.050 | -0.042   | 0.044 |
| $Z_1$     | -0.663        | 0.122  | 0.347 | 0.089    | 0.331 | -0.723        | 0.145  | 0.203 | 0.102    | 0.167 |
| $Z_2$     | 1.337         | 0.134  | 0.218 | 0.100    | 0.205 | 1.277         | 0.156  | 0.095 | 0.104    | 0.068 |
| $t$       | -1            | 0.025  | 0.030 | 0.019    | 0.029 | -1            | 0.032  | 0.002 | 0.023    | 0.002 |

Table F.4: Robustness Study with  $n = 200$  based on 1000 replications: Scenario S2

| Effect        | Case 1 |        |       |          |       | Case 2 |        |       |          |       |
|---------------|--------|--------|-------|----------|-------|--------|--------|-------|----------|-------|
|               | True   | Naive  |       | Proposed |       | True   | Naive  |       | Proposed |       |
|               |        | Bias   | SD    | Bias     | SD    |        | Bias   | SD    | Bias     | SD    |
| $a_1 = 0.5$   |        |        |       |          |       |        |        |       |          |       |
| $\tau = 0.25$ |        |        |       |          |       |        |        |       |          |       |
| Intercept     | 4.163  | -0.065 | 0.148 | -0.012   | 0.151 | 4.134  | -0.026 | 0.015 | 0.004    | 0.014 |
| $Z_1$         | -1.337 | 0.131  | 0.291 | 0.020    | 0.302 | -1.366 | 0.067  | 0.053 | 0.005    | 0.046 |
| $Z_2$         | 0.663  | 0.127  | 0.170 | 0.013    | 0.182 | 0.634  | 0.070  | 0.021 | 0.003    | 0.016 |
| $t$           | -1     | 0.030  | 0.029 | 0.003    | 0.031 | -1     | 0.020  | 0.001 | 0.003    | 6e-4  |
| $\tau = 0.5$  |        |        |       |          |       |        |        |       |          |       |
| Intercept     | 4.5    | -0.057 | 0.145 | -0.005   | 0.145 | 4.418  | -0.038 | 0.023 | 0.004    | 0.020 |
| $Z_1$         | -1     | 0.121  | 0.278 | 0.003    | 0.277 | -1.082 | 0.102  | 0.089 | 0.003    | 0.067 |
| $Z_2$         | 1      | 0.136  | 0.173 | 0.011    | 0.169 | 0.918  | 0.106  | 0.038 | 0.005    | 0.022 |
| $t$           | -1     | 0.025  | 0.026 | 0.001    | 0.027 | -1     | 0.025  | 0.001 | 0.003    | 6e-4  |
| $\tau = 0.75$ |        |        |       |          |       |        |        |       |          |       |
| Intercept     | 4.837  | -0.050 | 0.159 | -0.002   | 0.152 | 4.777  | -0.058 | 0.044 | -0.007   | 0.034 |
| $Z_1$         | -0.663 | 0.121  | 0.311 | 0.004    | 0.290 | -0.723 | 0.153  | 0.184 | 0.021    | 0.119 |
| $Z_2$         | 1.337  | 0.134  | 0.197 | 0.005    | 0.181 | 1.277  | 0.161  | 0.084 | 0.010    | 0.040 |
| $t$           | -1     | 0.022  | 0.027 | 0.001    | 0.026 | -1     | 0.031  | 0.002 | 0.003    | 0.001 |
| $a_1 = 1.0$   |        |        |       |          |       |        |        |       |          |       |
| $\tau = 0.25$ |        |        |       |          |       |        |        |       |          |       |
| Intercept     | 4.163  | -0.062 | 0.149 | -0.022   | 0.151 | 4.134  | -0.035 | 0.017 | -0.008   | 0.015 |
| $Z_1$         | -1.337 | 0.108  | 0.297 | 0.027    | 0.311 | -1.366 | 0.075  | 0.061 | 0.025    | 0.051 |
| $Z_2$         | 0.663  | 0.133  | 0.177 | 0.057    | 0.179 | 0.634  | 0.068  | 0.022 | 0.023    | 0.017 |
| $t$           | -1     | 0.033  | 0.031 | 0.014    | 0.033 | -1     | 0.022  | 0.001 | 0.008    | 8e-4  |
| $\tau = 0.5$  |        |        |       |          |       |        |        |       |          |       |
| Intercept     | 4.5    | -0.057 | 0.147 | -0.021   | 0.147 | 4.418  | -0.045 | 0.025 | -0.015   | 0.021 |
| $Z_1$         | -1     | 0.108  | 0.288 | 0.029    | 0.289 | -1.082 | 0.101  | 0.096 | 0.034    | 0.074 |
| $Z_2$         | 1      | 0.140  | 0.178 | 0.056    | 0.173 | 0.918  | 0.107  | 0.040 | 0.036    | 0.026 |
| $t$           | -1     | 0.027  | 0.027 | 0.012    | 0.028 | -1     | 0.027  | 0.002 | 0.010    | 8e-4  |
| $\tau = 0.75$ |        |        |       |          |       |        |        |       |          |       |
| Intercept     | 4.837  | -0.056 | 0.163 | -0.022   | 0.155 | 4.777  | -0.060 | 0.048 | -0.019   | 0.037 |
| $Z_1$         | -0.663 | 0.120  | 0.315 | 0.039    | 0.296 | -0.723 | 0.137  | 0.191 | 0.042    | 0.130 |
| $Z_2$         | 1.337  | 0.137  | 0.207 | 0.050    | 0.191 | 1.277  | 0.163  | 0.093 | 0.052    | 0.051 |
| $t$           | -1     | 0.024  | 0.028 | 0.010    | 0.027 | -1     | 0.034  | 0.002 | 0.011    | 0.001 |

Table F.5: Robustness Study with  $n = 200$  based on 1000 replications: Scenario S3

| Effect    | Case 1        |        |       |          |       | Case 2        |        |       |          |       |
|-----------|---------------|--------|-------|----------|-------|---------------|--------|-------|----------|-------|
|           | True          | Naive  |       | Proposed |       | True          | Naive  |       | Proposed |       |
|           |               | Bias   | SD    | Bias     | SD    |               | Bias   | SD    | Bias     | SD    |
|           | $\tau = 0.25$ |        |       |          |       | $\tau = 0.25$ |        |       |          |       |
| Intercept | 4.163         | -0.023 | 0.131 | 0.032    | 0.137 | 4.134         | -0.002 | 0.012 | 0.020    | 0.011 |
| $Z_1$     | -1.337        | 0.152  | 0.260 | -0.061   | 0.275 | -1.366        | 0.069  | 0.048 | -0.040   | 0.038 |
| $Z_2$     | 0.663         | 0.156  | 0.158 | -0.060   | 0.177 | 0.634         | 0.091  | 0.022 | -0.020   | 0.013 |
| $t$       | -1            | 0.015  | 0.026 | -0.014   | 0.031 | -1            | 0.010  | 6e-4  | -0.008   | 6e-4  |
|           | $\tau = 0.5$  |        |       |          |       | $\tau = 0.5$  |        |       |          |       |
| Intercept | 4.5           | -0.020 | 0.130 | 0.026    | 0.127 | 4.418         | -0.007 | 0.018 | 0.018    | 0.014 |
| $Z_1$     | -1            | 0.151  | 0.259 | -0.059   | 0.249 | -1.082        | 0.116  | 0.085 | -0.044   | 0.052 |
| $Z_2$     | 1             | 0.157  | 0.158 | -0.068   | 0.162 | 0.918         | 0.128  | 0.038 | -0.033   | 0.018 |
| $t$       | -1            | 0.011  | 0.023 | -0.011   | 0.024 | -1            | 0.012  | 7e-4  | 0.027    | 6e-4  |
|           | $\tau = 0.75$ |        |       |          |       | $\tau = 0.75$ |        |       |          |       |
| Intercept | 4.837         | -0.020 | 0.148 | 0.022    | 0.135 | 4.777         | -0.001 | 0.040 | 0.024    | 0.029 |
| $Z_1$     | -0.663        | 0.151  | 0.298 | -0.056   | 0.259 | -0.723        | 0.161  | 0.174 | -0.053   | 0.092 |
| $Z_2$     | 1.337         | 0.155  | 0.183 | -0.074   | 0.169 | 1.277         | 0.170  | 0.079 | -0.059   | 0.034 |
| $t$       | -1            | 0.011  | 0.025 | -0.010   | 0.023 | -1            | 0.014  | 0.001 | -0.012   | 9e-4  |

Table F.6: Parameter estimates of the proportional intensity model from the sensitivity analysis (Case A) for PBB study

| Coeff      | Estimate | exp(Estimate) | p-value |
|------------|----------|---------------|---------|
| $\alpha_1$ | 0.059    | 1.06          | 0.16    |
| $\alpha_2$ | 0.584    | 1.79          | < 0.001 |
| $\alpha_3$ | 0.028    | 1.03          | 0.66    |
| BMI        | 0.013    | 1.01          | 0.08    |

Table F.7: Parameter estimates and 95% confidence interval from the sensitivity analysis (Case A) for PBB study

| Quantile         | Estimate | 95% CI           |
|------------------|----------|------------------|
| <i>Intercept</i> |          |                  |
| 25th             | 0.182    | ( 0.150, 0.215)  |
| 50th             | 0.755    | ( 0.429, 1.080)  |
| 75th             | 1.435    | ( 1.253, 1.617)  |
| 85th             | 2.057    | ( 1.657, 2.457)  |
| 90th             | 2.845    | ( 2.214, 3.476)  |
| 95th             | 4.038    | ( 3.376, 4.701)  |
| <i>Time</i>      |          |                  |
| 25th             | 5e-15    | (-0.008, 0.008)  |
| 50th             | -0.001   | (-0.018, 0.015)  |
| 75th             | -6e-14   | (-0.011, 0.011)  |
| 85th             | -8e-4    | (-0.026, 0.024)  |
| 90th             | -0.027   | (-0.057, 0.004)  |
| 95th             | -0.060   | (-0.114, -0.006) |

Table F.8: Parameter estimates of the proportional intensity model from the sensitivity analysis (Case B) for PBB study

| Year        | Effect                                | coeff | exp(coeff) | p value |
|-------------|---------------------------------------|-------|------------|---------|
| before 1981 | $\log(\text{Initial PBB}) \in (1, 3]$ | 0.057 | 1.06       | 0.61    |
|             | $\log(\text{Initial PBB}) > 3$        | 0.206 | 1.23       | 0.24    |
| 1982 - 1989 | $\log(\text{Initial PBB}) \in (1, 3]$ | 1.649 | 5.20       | <0.001  |
|             | $\log(\text{Initial PBB}) > 3$        | 2.859 | 17.44      | <0.001  |
| 1990 - 1993 | $\log(\text{Initial PBB}) \in (1, 3]$ | 0.147 | 1.16       | 0.36    |
|             | $\log(\text{Initial PBB}) > 3$        | 0.053 | 1.05       | 0.85    |

Table F.9: Parameter estimates and 95% confidence interval from the sensitivity analysis (Case B) for PBB study

| Quantile         | Estimate | 95% CI          |
|------------------|----------|-----------------|
| <i>Intercept</i> |          |                 |
| 25th             | 0.182    | ( 0.169, 0.196) |
| 50th             | 0.576    | ( 0.131, 1.021) |
| 75th             | 1.455    | ( 1.269, 1.641) |
| 85th             | 2.094    | ( 1.696, 2.492) |
| 90th             | 2.840    | ( 2.220, 3.459) |
| 95th             | 3.998    | ( 3.383, 4.613) |
| <i>Time</i>      |          |                 |
| 25th             | 1e-16    | (-0.003, 0.003) |
| 50th             | 0.004    | (-0.018, 0.026) |
| 75th             | -0.004   | (-0.018, 0.011) |
| 85th             | -0.010   | (-0.035, 0.014) |
| 90th             | -0.027   | (-0.057, 0.004) |
| 95th             | -0.053   | (-0.118, 0.011) |
